# Supplementary material
Source: publisher figshare collection journal article supplement (https://gsapubs.figshare.com/articles/dataset/_/12532190)
Supplement: Supplementary file 1 [file 1]

## Sheet: Table 1
Table 1. Major controls on DSr values and inorganic carbonate Sr concentrations in Calcite and Aragonite seas.
Carbonate that formed in:	DSr	mMol Sr/Mol Ca of carbonate	[Sr] in carbonate (ppm)#	Reference for DSr values
Ordovician (Calcite Sea I)*
Precipitation rate	0.03-0.10	0.21-1.3	180-1100	Lorens (1981)
0.5-2.0 nmol/mg/min
Mg Content of Solution
[Mg]/[Ca]: 0 to 2.5	0.146-0.246	1.0-4.0	900-2800	Mucci and Morse (1983)
[Mg]/[Ca]: 0 to 10	0.05-.21	0.35-2.7	310-2400	Morse and Bender (1990)
Temperature	0.034-0.039	0.24-0.51	210-440	Katz et al. (1972)
48-98 ºC
Calcite Sea II&	0.05-0.21	0.22-2.9	190-2600	Morse and Bender (1990)
Aragonite Sea II$	1	1.8-7.9	1600-6900	Steuber and Veizer (2002)
Aragonite-to-calcite transformation during diagenesis	0.046-0.068	0.083-0.54	73-470	Malone and Baker (1999)
* -seawater Sr/Ca =7–13 mMol/Mol (Steuber and Veizer, 2002)
& - Jurassic–Cretaceous, Sr/Ca = 4.4–14 mMol/Mol (Steuber and Veizer, 2002)
$ - Carboniferous–Triassic, Sr/Ca = 1.8–7.9 mMol/Mol (Steuber and Veizer, 2002)
# - calculated using the molar weights of 87.62 g Sr/Mol Sr and 100.048 g CaCO3/Mol CaCO3

## Sheet: DR1-Rocks
Table DR1. 87Sr/86Sr values of bulk carbonate (87Sr/86Srcarb), the Sr concentration (ppm), the estimated seawater 87Sr/86Sr
value, and the Δ87Sr/86Sr from the eight studied sections.
Sample ID	Meters in section	Time Slice	Age (Ma)	87Sr/86Sr Carbonate	Uncertainty (x 10-6)	ppm Sr	Seawater 87Sr/86Sr	DSr (87Sr/86Srcarb-87Sr/86Srseawater)	Paired D87Sr/86Sr value -(87Sr/86Srcarb-87Sr/86Srconodont)
Antelope Range - CAI: 1-2 (Young et al., 2009)
257.5	257.5	4a	466	0.708833	5	236	0.708705	0.000128	0.000199
311.5	311.5	4b	463.347	0.708843	12	260	0.708695	0.000199
330	330	4b	462.287	0.708693	15	313	0.70857	0.000119
335	335	4b	462.028	0.708664	12	200	0.708528	0.000114
360	360	4c	460.403	0.708484	9	197	0.70837	7.9e-05
379.5	379.5	4c	458.726	0.708425	13	293	0.708285	9.7e-05
402	402	5a	457.069	0.708266	17	220	0.70815	3.8e-05
409.5	409.5	5a	456.582	0.708239	10	154	0.708105	5.1e-05
423	423	5b	455.176	0.70809	7	716	0.70804	2.6e-05
445.5	445.5	5b	454.389	0.708179	13	199	0.70799	0.000163
466	466	5b	453.958	0.708094	13	545	0.707972	9.6e-05
Oklahoma - CAI: 1-2
83JD-21	21	4b	463.68	0.708867	10	74	0.70863	0.00021	0.000181
83JD-26	26	4b	463.238	0.708921	9	194.3	0.708628	0.000283	0.000258186
83JD-30	30	4b	462.884	0.709026	8	163.1	0.708628	0.000407
83JD-33	33	4b	462.619	0.708755	9	264.4	0.708627	0.00015	0.000128184
83JD-36	36	4b	462.354	0.708742	9	210.2	0.708625	0.000162397
83JD-39	39	4b	462.326	0.708769	10	211.3	0.708624	0.000191
83JD-42	42	4b	462.298	0.708753	14	405.2	0.708622	0.000178	0.000116
83JD-48	48	4b	462.242	0.708699	9	377	0.708618	0.000128
83JD-54	54	4b	462.186	0.708721	9	211.4	0.708615	0.000154
83JD-57	57	4b	462.158	0.708776	11	208.01	0.708614	0.000213
83JD-60	60	4b	462.13	0.708745	13	241.6	0.708612	0.000186
83JD-63	63	4b	462.102	0.708741	13	162.59	0.70861	0.000186
83JD-80	80	4c	461.943	0.708772	10	182.5	0.708603	0.000228	0.000107
83JD-88	88	4c	461.868	0.708742	9	225.59	0.7086	0.000205397
83JD-98	98	4c	461.774	0.708763	27	181.8	0.708592	0.000238
83JD-104	104	4c	461.718	0.708704	15	255.137	0.70859	0.000184975	0.000107975
83JD-110	110	4c	461.662	0.708839	17	25	0.708588	0.000327	0.000228
83JD-120	120	4c	461.569	0.708642	10	233.259	0.708572	0.000139091	4.70913e-05
83JD-166	166	4c	460.719	0.708624	14	434.647	0.708487	0.000200353	0.000137353
83JD-184	184	4c	459.795	0.708566	9	136.166	0.708425	0.000189618	0.000140618
83JD-211	211	4c	458.41	0.708618	18	190.545	0.70836	0.000305207	0.000132207
83JE-8	219	5a	457.999	0.708171	10	165.5	0.70833	-0.00012
83JE-13	224	5a	457.743	0.708191	14	141.271	0.70832	-8.49441e-05
83JE-33	244	5a	456.716	0.70834	9	150.476	0.708263	0.000139498	7.79145e-05
83JE-43	254	5a	456.317	0.708216	8	612.695	0.708201	5.43633e-05
83JE-48	259	5a	456.118	0.708204	7	530.364	0.708197	6.27812e-05
83JE-66	277	5b	455.399	0.708148	10	355.498	0.708125	6.72751e-05	2.31614e-05
83JE-76	287	5b	455	0.708083	10	170.2	0.70809	3.2402e-05
83JE-81	292	5b	454.8	0.707994	8	263.247	0.70808	-4.57924e-05	-0.000156792
Clear Spring - CAI: 3-4
CS2412	0	2c	470.42	0.708681	28	217	0.7087	-6.6e-05
CS2420	16	3a	469.784	0.708789	23	227	0.70869	5.7e-05
CS2492	158	4b	462.527	0.708795	9	137	0.708625	0.000201
CS2493	160	4b	462.35	0.708843	7	218	0.70862	0.000263
CS2628	161	4b	462.34	0.7088	12	134	0.70862	0.000221
CS2629	161.5	4b	462.335	0.708593	7	157	0.708618	1.5e-05
CS2494	162	4b	462.33	0.708867	20	95	0.708618	0.000289
CS2496	166	4b	462.289	0.708729	8	110	0.708615	0.000155	0.000114
CS2498	170	4b	462.248	0.708686	7	148	0.708608	0.000114
CS2499	172	4b	462.228	0.708695	35	157	0.708605	0.000125
CS2500	174	4b	462.208	0.708715	25	145	0.708603	0.000146
CS2501	176	4b	462.187	0.708718	7	125	0.708601	0.000151
CS2504	182	4b	462.126	0.708726	13	155	0.708593	0.000167
CS2512	198	4c	461.964	0.709171	21	66	0.708575	0.000626
CS2518	210	4c	461.842	0.708701	18	176	0.70856	0.000168
CS2521	216	4c	461.781	0.708943	8	92	0.708548	0.000417
CS2532	238	4c	461.557	0.70869	47	244	0.7085	0.000188
CS2541	256	4c	461.374	0.708634	16	88	0.70845	0.000151
CS2544	262	4c	461.313	0.708546	10	347	0.708435	6.9e-05
CS2549	272	4c	461.125	0.708551	10	197	0.70835	9e-05
CS2562	298	4c	459.74	0.708631	15	261	0.708275	0.000258
CS2584	332	5a	457.928	0.708793	14	269	0.708262	0.000506	0.000531
CS2599	362	5a	455.732	0.708283	7	713	0.7082	0.000177
Rocky Gap - CAI: 3-4
37224	15	1b	482.72	0.709089	11	50.4	0.708977	0.000112114	0.000112114
37227	18	1b	482.71	0.708977	21	37.4537	0.708977	-2.22848e-07	-2.22848e-07
37235	30	1b	482.7	0.709197	10	28.0832	0.708977	0.000220197	0.000220197
37245	45.216	1c	480.75	0.709317	10	49.0478	0.708937	0.000379797
37246	46.74	1c	480.45	0.709321	9	43.7065	0.70893	0.000390852
37250	51.312	1d	480	0.709213	10	47.0418	0.70892	0.000293464
37255	58.932	4b	462.138	0.708619	10	73.012	0.70856	5.85928e-05
37256	61.98	4c	461.34	0.708529	9	171.671	0.70848	4.9e-05
37257	63.504	4c	461.122	0.708599	14	86.0567	0.70846	0.000138773
37258	65.028	4c	460.917	0.708558	9	111.091	0.70844	0.000117754
36538	70	4c	460.5	0.708568	9	128.706	0.708413	0.000154826
36539	70.762	4c	460.462	0.70838	8	248.706	0.70841	-3.04216e-05
36540	71.524	4c	460.437	0.708651	9	211.91	0.708408	0.000243448
36541	72.286	4c	460.412	0.708399	9	157.528	0.708406	-7.32781e-06
36542	73.048	4c	460.4	0.708456	10	161.547	0.708405	5.05762e-05
36543	73.81	4c	460.319	0.708464	11	165.878	0.7084	6.35943e-05
36545	75.334	4c	460.26	0.708413	10	215.574	0.708397	1.64684e-05
36547	76.858	4c	460.137	0.708394	11	118.261	0.70839	3.55947e-06
36548	77.62	4c	460.119	0.708407	11	132.936	0.708389	1.76744e-05
36550	79.144	4c	460.075	0.708416	12	72.0084	0.708387	2.86432e-05
36554	82.192	4c	459.78	0.708373	13	121.79	0.708375	-2.16107e-06
36556	83.716	4c	459.675	0.708438	13	116.254	0.70837	6.80711e-05
36560	86.764	4c	459.5	0.708372	9	250.973	0.708364	7.91237e-06
36562	88.288	4c	459.35	0.708344	11	200.236	0.708357	-1.27085e-05
36564	89.812	4c	459.3	0.70835	11	193.198	0.708355	-5.27212e-06
36566	91.336	4c	459.219	0.708327	17	229.504	0.70835	-2.29686e-05
36568	92.86	4c	459.175	0.7084	9	181.503	0.708348	5.17054e-05
36570	94.384	4c	459.04	0.708328	11	148.745	0.708342	-1.39951e-05
36572	95.908	4c	458.95	0.708314	11	185.83	0.708338	-2.39953e-05
36574	97.432	4c	458.88	0.708323	13	148.982	0.708335	-1.23776e-05
36576	98.956	4c	458.82	0.708319	14	260.75	0.708332	-1.29668e-05
36578	100.48	4c	458.68	0.708327	11	218.438	0.708325	1.5949e-06
36580	102.004	4c	458.66	0.708326	29	154.585	0.708324	1.51955e-06
36582	103.528	4c	458.6	0.708434	11	170.943	0.708321	0.000113427
36592	111.148	5a	458.36	0.708297	11	147.212	0.708309	-1.22517e-05
36602	118.768	5a	458.14	0.708314	12	159.395	0.708298	1.63352e-05
36604	120.292	5a	458.08	0.708363	12	131.487	0.708295	6.84354e-05
36610	124.864	5a	457.987	0.708292	11	184.008	0.70829	1.71075e-06
36614	127.912	5a	457.937	0.708267	11	202.248	0.708287	-2.02587e-05
36616	129.436	5a	457.85	0.70837	10	152.966	0.708282	8.76134e-05
36624	135.532	5a	457.819	0.708334	11	221.746	0.70828	5.42109e-05
36630	140.104	5a	457.78	0.708278	9	381.456	0.708278	-6.30836e-08
36473	166	5a	457.575	0.708309	9	184.082	0.708265	4.42727e-05	4.42727e-05
36475	169	5a	457.562	0.7083	11	245.706	0.708264	3.63264e-05	3.63264e-05
36479	175	5a	457.512	0.708399	16	178.308	0.70826	0.000138772	0.000138772
36481	178	5a	457.487	0.708284	9	178.898	0.708258	2.58308e-05	2.58308e-05
36483	181	5a	457.462	0.708262	8	200.515	0.708256	5.90536e-06	5.90536e-06
36485	184	5a	457.45	0.708281	11	252.15	0.708255	2.5856e-05	2.5856e-05
36487	187	5a	457.425	0.708297	13	326.621	0.708253	4.3947e-05	4.3947e-05
36491	193	5a	457.35	0.70833	10	260.459	0.708248	8.16651e-05	8.16651e-05
36493	196	5a	457.3	0.708273	10	108.86	0.708245	2.8e-05	2.8e-05
36503	211	5a	457.162	0.708264	12	208.255	0.708235	2.89361e-05	2.89361e-05
36508	218.5	5a	457.087	0.708292	8	323.8	0.708229	6.3e-05	6.3e-05
36509	220	5a	457.075	0.708228	9	300.444	0.708228	3.49072e-07	3.49072e-07
36533	256	5a	456.925	0.708459	9	167.334	0.708216	0.000243005	0.000243005
Roaring Spring and Union Furnace (Central PA) - CAI: 3-4.5
RS-6449	0	3b	468.5	0.709058	18	52.8962	0.70872	0.000337783
RS-6446	15	3b	468.5	0.709091	9	47.796	0.70872	0.000370725
RS-6443	30	3b	467.5	0.708793	14	53.7244	0.708718	7.52e-05
RS-6438	55	4a	467.1	0.708989	30	45.2561	0.708715	0.000274
RS-6435	70	4a	466.6	0.709233	26	48.1026	0.70871	0.000523
RS-6434	75	4a	466.6	0.708809	10	57	0.70871	9.9e-05
RS-6430	95	4a	466	0.708765	14	361.318	0.708705	6.02153e-05
RS-6428	105	4a	465.275	0.70899	11	63.8134	0.708695	0.000294583
NEQ-60	155	4b	462.192	0.70891	27	98	0.708567	0.000343	0.000343
RS-6416	165	4c	461.809	0.708788	13	63.9998	0.70853	0.000257632
NEQ-45	170	4c	461.587	0.708685	8	128	0.708504	0.000181	0.000181
RS-6410	195	4c	460.462	0.708665	16	64.1465	0.70841	0.000254987
RS-6409	200	4c	460.137	0.708654	10	76.4089	0.70839	0.000264405
RS-6406	215	4c	459.04	0.708391	23	152.344	0.708342	4.88374e-05
RS-6632	215.5	4c	458.88	0.708536	14	234.219	0.708335	0.000200914
RS-6368	216	4c	458.88	0.708518	13	199	0.708335	0.000183
RS-6634	216.5	4c	458.88	0.708469	10	261.468	0.708335	0.000134326
RS-6374	222	4c	458.525	0.70851	9	151.632	0.708318	0.000191855
RS-6376	224	5a	458.34	0.708612	12	100.926	0.708308	0.000304039
RS-6378	226	5a	458.28	0.708442	11	84.7231	0.708305	0.000137323
RS-6380	228	5a	458.08	0.70845	10	147.999	0.708295	0.000154581
RS-6386	234	5a	457.72	0.708336	14	681.478	0.708275	6.08793e-05
RS-6389	237	5a	457.575	0.708411	11	284.563	0.708265	0.000145598
RS-6392	240	5a	457.45	0.708359	9	453.558	0.708255	0.000103952
RS-6394	242	5a	457.35	0.708271	11	84	0.708248	2.3e-05
RS-6396	244	5a	457.229	0.708276	10	909.995	0.70824	3.55016e-05
RS-6400	248	5a	456.975	0.708446	19	255.672	0.70822	0.000226332
NEQ+37	252	5a	456.767	0.708274	11	75611	0.708205	6.9e-05	4.6e-05
UF-6364	260.1	5a	456.5	0.708274	8	308	0.70818	9.4e-05
UF-6362	269	5a	456.333	0.708318	9	377.282	0.708163	0.000154632
UF-6358	280.5	5a	456.133	0.708302	10	471	0.708143	0.000159422
UF-6354	284.2	5a	456.067	0.708239	9	557.046	0.708136	0.000103199
UF-6349	288.8	5a	456	0.708199	8	369.04	0.70813	6.85875e-05
UF-6345	295	5a	455.9	0.708336	9	272.188	0.708123	0.000212501
UF-6341	303	5a	455.764	0.708308	11	333.657	0.70811	0.000197919
UF-6337	311	5a	455.667	0.708261	80	295.651	0.7081	0.000161302
UF-6333	324.2	5b	455.44	0.708161	8	310.751	0.708083	7.80041e-05
UF-6329	336.8	5b	455.244	0.708202	9	328.8	0.70807	0.000131711
UF-6323	354.8	5b	455.086	0.708187	7	357.524	0.708057	0.000129832
UF-6322	356	5b	455.057	0.708185	9	477.012	0.708055	0.000130271
UF-6321	357.2	5b	454.987	0.708146	9	528.94	0.70805	9.64079e-05
UF-6314	378.5	5b	454.95	0.708209	13	244.209	0.708047	0.000161872
UF-6313	381	5b	454.925	0.708129	8	1296.19	0.708045	8.4441e-05
Shingle Pass - CAI: 3.5-4
SP-82	25	-	485.577	0.709122	19	187	0.709003	7.2e-05
SP300	91.4634	1c	480.223	0.709038	9	203	0.709003	0.000112	3.5e-05
SP573	174.695	1c	480.123	0.709351	13	143	0.709	0.000428	0.000259
SP-630	192.073	1c	480.095	0.711213	9	260	0.709	0.00229
SP991	302.134	1d	479.956	0.710489	39	110	0.709	0.00157	0.001474
SP1042	317.683	1d	479.884	0.710618	11	204	0.709	0.001706	0.001603
SP1200	365.854	1d	479.212	0.709643	10	168	0.70898	0.00075	0.000647
SP1277	389.329	1d	478.885	0.709741	16	167	0.708963	0.000857	0.000778
SP1402	427.439	1d	478.365	0.709387	14	186	0.708901	0.000515	0.000486
SP1540	469.512	1d	477.799	0.709167	10	191	0.70888	0.000307	0.000239
SP1760	536.585	2a	475.92	0.709146	10	143	0.70885	0.000329	0.000182
SP1820	554.878	2b	475.282	0.709329	14	163	0.70885	0.000524	0.000478
SP1980	603.659	2b	473.699	0.709347	11	196	0.708807	0.00056	0.00054
SP2404	732.927	2c	471.286	0.70956	13	207	0.7088	0.00081	0.000745
SP-2620	798.78	2c	470.033	0.709181	-	214	0.7088	0.000444
SP2653	808.841	3a	469.832	0.709021	10	181	0.7088	0.0003	0.000221
SP2848	868.293	3a	468.658	0.709116	11	177	0.708805	0.000397	0.000274
SPK4980	872	3b	467.657	0.709549	14	157.75	0.708808	0.000829713
SPK 4999	929	4a	467.126	0.709461	15	201.599	0.70882	0.000744664
SPK 5007	953	4a	466.954	0.7095	10	188.583	0.70882	0.000786401
SPK5011	965	4a	466.869	0.709382	10	109.806	0.708822	0.000670056
SPK5019	989	4a	466.697	0.709753	12	167.397	0.708822	0.00104238
SPK 5036	1040	4a	466.286	0.710668	9	311.741	0.708812	0.00196092
SPK 5051	1085	4a	465.611	0.709056	12	226.857	0.70879	0.000356467
SPK5058	1106	4a	465.297	0.709269	9	233.172	0.70876	0.000575461
SPK5063	1121	4a	465.072	0.708908	7	117.224	0.708755	0.000215717
SPK5069	1139	4b	464.802	0.708868	9	121.922	0.70875	0.000179598
SPK5072	1148	4b	464.667	0.708996	10	162.762	0.708745	0.000310083
SPK5074	1154	4b	464.577	0.708767	8	162.711	0.708742	8.27037e-05
SPK 5078	1166	4b	464.397	0.708865	20	149.489	0.708738	0.000183359
SPK5081	1175	4b	464.307	0.708682	9	385.336	0.708735	5.51464e-06
SPK5088	1196	4b	463.948	0.708711	9	176.697	0.708728	4.49634e-05
SPK5090	1202	4b	463.858	0.708729	10	263.928	0.708723	6.48631e-05
SPK5095	1217	4b	463.633	0.708794	12	148.625	0.708715	0.0001393
SPK5099	1229	4b	463.453	0.708639	11	21.4478	0.70871	-8.78918e-06
SPK5101	1235	4b	463.408	0.708903	16	19.4231	0.708708	0.000258931
Meiklejohn Peak - CAI: 4-5
MP 109	316	4b	464.018	0.708789	14	182.112	0.708755	0.000119148
MP 126	341.5	4b	463.941	0.708805	12	120.41	0.708748	0.000139148
MP 139	361	4b	463.883	0.708908	13	180.163	0.70874	0.000244453
MP 154	383.5	4b	463.815	0.708853	13	131.147	0.708733	0.000189593
MP-164	398.5	4b	463.769	0.709024	9	222	0.70873	0.000363
MP 166	401.5	4b	463.73	0.70916	8	152.434	0.70873	0.000501217
MP 170	407.5	4b	463.652	0.709036	13	285.975	0.70873	0.000380447
MP 182	425.5	4b	463.417	0.708734	9	714.081	0.708728	8.66837e-05
MP 196	446.5	4b	463.144	0.708776	13	585.263	0.708727	0.000141683
MP 207	463	4b	462.945	0.708724	13	548.645	0.708726	0.000101295
MP-219	481	4b	462.804	0.708863	10	407	0.708725	0.000249
MP 225	490	4b	462.733	0.708823	10	658.588	0.708724	0.000212694
MP 235	505	4b	462.616	0.708748	9	774.552	0.708721	0.0001465
MP-245	520	4b	462.498	0.708754	11	534	0.708715	0.000162
MP 253	532	4b	462.404	0.708858	11	375.216	0.70871	0.000272523
MP-255	535	4b	462.381	0.708688	11	546	0.70871	0.000105
MP 261	544	4b	462.083	0.708698	11	586.571	0.708652	0.000143614
MP-269	554.5	4c	461.533	0.709014	13	137	0.70857	0.000514
MP-270	556	4c	461.454	0.708891	12	155	0.708552	0.0004
MP 278	568	5a	456.562	0.70868	15	178.152	0.7084	0.000493998
Interstate 81 - CAI: 4-5
I-81 1	-4	4c	460.54	0.709152	12	46.7697	0.708405	0.000736759	0.000746759
I-81 2	-3	4c	460.44	0.708898	10	67.6425	0.708405	0.000489624
I-81 3	-1.5	4c	460.29	0.709251	20	67.0449	0.708405	0.000851619
I-81 4	-1	4c	460.24	0.708843	25	92.0139	0.708405	0.000446508	0.000437508
I-81 5	-0.5	4c	460.19	0.708596	8	122.28	0.708405	0.000202911
I-81 6	-0.1	4c	460.15	0.708735	10	83.9	0.708405	0.000344
I-81 7	0	4c	460.14	0.709091	8	61.2139	0.708405	0.000700788
I-81 8	0.1	4c	460.13	0.708808	68	120.326	0.708405	0.000417761
I-81 9	0.5	4c	460.09	0.708601	11	116.051	0.708405	0.000212539
I-81 10	1	4c	460.04	0.708529	10	133.111	0.708405	0.000143329	0.000124329
I-81 12	3	4c	459.84	0.708775	14	145.639	0.708405	0.000396892
I-81 13	4	4c	459.74	0.708635	11	113.134	0.708405	0.000262244	0.000230244
I-81 14	5	4c	459.64	0.708528	8	123.028	0.708405	0.000159
			Total:	230
	Total D87Sr/86Sr:		<.000100	81			ppm Sr	Mean D87Sr/86Sr	Number
			<.000200	146			>150	0.000199	153
			<.000300	180			>200	0.00018	97
			<.000400	197			>250	0.000157	62
			<.000500	206			>300	0.000109	43
							>350	0.000114	34
							>400	0.000119	25
							>500	0.000103	19
							>600	9.5e-05	10
Note: Seawater 87Sr/86Sr values are determined by obtaining the 87Sr/86Sr value of the black dashed line in Figure 2 (the seawater trend using
the least radiogenic 87Sr/86Srconodont values). Note that not all 87Sr/86Srconodont values fall on this line.

## Sheet: DR2-Conodonts
Table DR2. 87Sr/86Sr values of conodont apatite (87Sr/86Srconodont), the Sr concentration (ppm), the corrected 87Sr/86Srconodont value, the estimated
seawater 87Sr/86Sr value, and the Δ87Sr/86Sr from the eight studied sections.
Sample ID	Meters in section	Time Slice	Age (Ma)	87Sr/86Sr Conodont	Uncertainty (x 10-6)	ppm Sr	# of elements	Weight (mg)	Corrected 87Sr/86Sr conodont	Seawater 87Sr/86Sr	DSrconodont (87Sr/86Srconodont-87Sr/86Srseawater)	Paired D87Sr/86Sr value -(87Sr/86Srconodont-87Sr/86Srseawater)
Antelope Range - CAI: 1-2 (Saltzman et al., 2014)*
5-15-78Qc	297.622	4b	464.5	0.708724	10	12968	5	0.894	0.708737	0.708737	5.6e-05
5-15-78Pc	304.939	4b	464	0.708751	19	20532	7	0.286	0.708764	0.708725	9.6e-05
5-25-82Ac	313.78	4b	463.768	0.708702	11	17350	16	0.495	0.708715	0.708715	5.4e-05
5-25-82Jc	320.183	4b	463.1	0.708667	6	20350	13	0.431	0.70868	0.70868	4.8e-05
5-25-82Nc	322.927	4b	462.814	0.70865	11	14144	8	0.466	0.708663	0.708663	4.8e-05
5-25-82Rc	325.976	4b	462.495	0.708659	8	10875	5	0.34	0.708672	0.708633	8e-05
5-25-82Uc	329.939	4b	462.29	0.708628	12	5879	10	0.23	0.708641	0.708593	6.7e-05
5-25-82ABc	333.902	4b	462.085	0.708547	6	10961	9	0.278	0.70856	0.70856	6e-06
8-8-75Bc	350.366	4c	461.232	0.70841	13	9923	24	0.315	0.708423	0.708423	-4.7e-05
5-25-82AIc	352.5	4c	461.048	0.708448	9	13005	18	0.543	0.708461	0.708406	2e-06
5-25-82AIbc	352.5	4c	461.048	0.708447	15	8902	5	0.243	0.70846	0.708406	1e-06
5-25-82AKc	355.854	4c	460.76	0.708454	17	3233	7	0.259	0.708467	0.708398	4e-05
5-26-82Ac	368.963	4c	459.632	0.708343	10	9418	12	0.182	0.708356	0.708356	-1.4e-05
5-26-82Mc	388.78	5a	457.928	0.708266	7	8432	10	0.544	0.708279	0.708245	-1.1e-05
8-8-75Fc	414.39	5a	456.264	0.708244	14	2676	5	0.642	0.708257	0.708093	0.0001
8-8-75Fbc	414.39	5a	456.264	0.708229	15	2973	6	0.376	0.708242	0.708093	8.5e-05
5-26-82ASc	425.98	5b	454.8	0.708026	13	7425	15	0.214	0.708039	0.708039	-2e-06
8-8-75Ic	472.93	5b	453.812	0.707973	10	6765	17	0.279	0.707986	0.707986	-8e-06
5-15-78Jc	482.07	5b	453.286	0.707952	19	6069	8	0.201	0.707965	0.707965	-9e-06
Oklahoma - CAI: 1-2 (Saltzman et al., 2014)
72SB-13c	-300	3a	468.75	0.708779	11	12441	16	0.251	0.708792	0.708752	7.2e-05
72SB-139c	-261.585	3b	468	0.70872	9	9309	7	0.143	0.708733	0.708733	1.4e-05
72SB-239c	-231.098	3b	467.5	0.708756	9	8341	5	0.512	0.708769	0.708723	5.1e-05
72SB-365c	-192.988	4a	466.734	0.708791	13	17230	11	0.296	0.708804	0.708713	9.3e-05
72SC-120c	-156.402	4a	466.301	0.708699	8	18287	5	0.525	0.708712	0.708712	4e-06
72SC-220c	-125.915	4a	465.902	0.7087	12	20272	13	0.404	0.708713	0.708698	1e-05
72SC-390c	-74.0854	4a	465.105	0.708671	10	16505	14	0.553	0.708684	0.708684	-8e-06
72SC-500c	-40.5488	4b	464.507	0.708701	12	18022	14	0.363	0.708714	0.708666	3.3e-05
72SC-630c	-0.914634	4b	464.133	0.708718	9	19870	13	0.275	0.708731	0.708653	6e-05
83JD-20c	20	4b	463.768	0.708678	10	10686	12	0.323	0.708691	0.708643	3e-05
83JD-21c	21	4b	463.68	0.708686	8	23373	11	0.217	0.708699	0.708643	4.2e-05	0.000168
83JD-26c	26	4b	463.238	0.708663	8	11508.5	29	0.256	0.708676	0.708641	3.78139e-05	0.000245186
83-JD-26bc	26	4b	463.238	0.708697	16	4597	31	0.166	0.70871	0.708641	7.2e-05
83JD-33c	33	4b	462.619	0.708627	7	8721.59	17	0.452	0.70864	0.70864	3.48161e-05	0.000115184
83JD-42c	42	4b	462.298	0.708637	7	11546	16	0.278	0.70865	0.708635	7.5e-05	0.000103
83JD-80c	80	4c	461.943	0.708665	17	8750	-	-	0.708678	0.708616	0.000134	9.4e-05
83JD-104c	104	4c	461.718	0.708596	8	8041	-	-	0.708609	0.708609	9e-05	9.49752e-05
83JD-110c	110	4c	461.662	0.708611	12	5392	-	-	0.708624	0.708601	0.000112	0.000215
83JD-120c	120	4c	461.569	0.708595	9	8782	29	0.157	0.708608	0.708585	0.000105	3.40913e-05
83JD-166c	166	4c	460.719	0.708487	13	8411	12	0.058	0.7085	0.7085	7.6e-05	0.000124353
83JD-184c	184	4c	459.795	0.708425	6	12323	9	0.502	0.708438	0.708438	6.2e-05	0.000127618
83-JD-184bc	184	4c	459.795	0.708554	13	11001	7	0.466	0.708567	0.708438	0.000191
83JD-191c	191	4c	459.436	0.708541	7	7159	19	0.277	0.708554	0.708423	0.000193
83JD-211c	211	4c	458.41	0.708486	7	7997	16	0.315	0.708499	0.708373	0.000186	0.000119207
83JE-0.8c	211.8	5a	458.369	0.708482	10	9072	11	0.213	0.708495	0.708368	0.000185
83JE-5.6c	216.6	5a	458.122	0.708474	11	9337	13	0.284	0.708487	0.708353	0.00019
83JE-18.5c	229.5	5a	457.461	0.708355	9	14348	15	0.168	0.708368	0.708313	0.000112
83JE-33c	244	5a	456.716	0.708263	8	10158.6	13	0.203	0.708276	0.708276	7.45832e-05	6.49145e-05
83JE-66c	277	5b	455.399	0.708125	9	16737	9	0.286	0.708138	0.708138	5.71137e-05	1.01614e-05
83JE-81c	292	5b	454.8	0.708151	8	12172	5	0.222	0.708164	0.708093	0.000124	-0.000169792
Clear Spring - CAI: 3-4 (Saltzman et al., 2014)
I70-9c	9	2c	470.062	0.708755	12	17649	16	0.094	0.708768	0.708703	3e-05
I70-20c	20	3a	469.625	0.708685	10	5890.82	13	0.336	0.708698	0.708698	-3.3e-05
I70-20bc	20	3a	469.625	0.708751	14	15216	13	0.263	0.708764	0.708698	3.3e-05
I70-30.2c	30.2	3a	469.219	0.708752	12	11193.4	11	0.376	0.708765	0.708698	4.1e-05
I70-30.2bc	30.2	3a	469.219	0.708698	8	18171	18	0.406	0.708711	0.708698	-1.3e-05
CS-50c	50	3b	468.428	0.708775	19	3424	13	0.143	0.708788	0.708703	6.8e-05
CS-90c	90	4a	466.851	0.708769	20	8779	15	0.18	0.708782	0.708708	6.9e-05
CS-122c	122	4a	465.14	0.708775	28	6771	15	0.202	0.708788	0.708708	9.5e-05
CS-130c	130	4b	464.591	0.708721	21	2012	19	0.283	0.708734	0.708703	5e-05
I70-140c	140	4b	463.905	0.708735	14	15030.2	15	0.1	0.708748	0.708668	8.3e-05
I70-146c	146	4b	463.591	0.708642	14	9789.63	11	0.003	0.708655	0.708655	1e-06
I70-152c	152	4b	463.059	0.708625	44	8020.45	9	0.019	0.708638	0.708638	8e-06
I70-166c	166	4b	462.289	0.708688	13	4316.55	6	0.079	0.708701	0.708626	0.000127	2.8e-05
I70-220c	220	4c	461.74	0.708559	18	8569.23	8	0.099	0.708572	0.708553	5.1e-05
I70-240c	240	4c	461.537	0.708501	11	11346.3	7	0.19	0.708514	0.708514	1.4e-05
I70-240bc	240	4c	461.537	0.708537	22	9427	12	0.161	0.70855	0.708514	5e-05
I70-250c	250	4c	461.435	0.708474	10	5482.32	11	0.227	0.708487	0.708487	-3e-06
I70-260c	260	4c	461.334	0.708439	9	9269.9	11	0.293	0.708452	0.708452	-2.7e-05
I70-270c	270	4c	461.232	0.708479	13	7417.7	9	0.258	0.708492	0.708433	2.2e-05
I70-280c	280	4c	460.699	0.708417	35	8408.81	12	0.163	0.70843	0.708413	8e-06
I70-290c	290	4c	460.166	0.708381	8	10548.7	14	0.257	0.708394	0.708394	2e-06
I70-300c	300	4c	459.633	0.708358	10	8286	12	0.302	0.708371	0.708363	2e-06
I70-300bc	300	4c	459.633	0.708429	19	7927	18	0.382	0.708442	0.708363	7.3e-05
I70-310c	310	4c	459.1	0.708324	9	9363.56	18	0.402	0.708337	0.708337	-8e-06
I70-320c	320	4c	458.567	0.708325	11	8429.5	15	0.338	0.708338	0.708303	1.8e-05
I70-330c	330	5a	458.034	0.708269	11	10771.4	10	0.316	0.708282	0.708282	-1.1e-05
I70-332c	332	5a	457.928	0.708318	8	5817.99	14	0.64	0.708331	0.708278	4.4e-05	0.000462
I70-435.4c	435.4	5b	453.348	0.708096	22	9690.59	18	0.035	0.708109	0.708109	0.000135
Rocky Gap - CAI: 3-4 (this study)
RG-9c	34.2439	1b	482.7	0.70898	11	12418	13	0.183	0.708993	0.708977	1.6e-05
RG-20c	37.5976	1b	482.7	0.708964	13	19618	11	0.304	0.708977	0.708977	0
RG-42c	44.3049	1c	481.3	0.708936	18	9723	9	0.25	0.708949	0.708949	0
RG-59c	49.4878	1c	481.2	0.708934	11	9532	10	0.327	0.708947	0.708947	0
RG-70c	52.8415	1c	480.55	0.708919	12	18536	6	0.333	0.708932	0.708932	0
RG5c	63.0244	4c	461.6	0.708492	11	9753	9	0.362	0.708505	0.708505	0
RG6.5c	64.5244	4c	461.222	0.708456	9	12170	8	0.316	0.708469	0.708469	0
RG8c	66.0244	4c	460.983	0.708502	9	8595	15	0.195	0.708515	0.708448	6.7e-05
RG13.65c	71.2	4c	460.711	0.708494	10	10611	4	0.437	0.708507	0.708423	8.4e-05
RG14.45c	72	4c	460.711	0.708436	8	12469	6	0.525	0.708449	0.708423	2.6e-05
RG5'-14.45c	73.5244	4c	460.587	0.708492	14	7897	30	0.046	0.708505	0.708418	8.7e-05
RG-15c	74.5732	4c	460.5	0.708477	14	9915	2	0.386	0.70849	0.708413	7.7e-05
RG-71c	91.6463	4c	459.219	0.708367	18	8454	12	0.223	0.70838	0.70835	3e-05
RG-130c	109.634	4c	458.437	0.708396	14	8040	3	0.504	0.708409	0.708313	9.6e-05
RG-159c	118.48	5a	458.14	0.708348	26	7681	22	0.186	0.708361	0.708298	6.3e-05
RG-191c	128.232	5a	457.937	0.708296	9	8215	10	0.197	0.708309	0.708287	2.2e-05
RG-219c	136.768	5a	457.837	0.708376	19	8335	11	0.254	0.708389	0.708281	0.000108
Roaring Spring and Union Furnace (Central PA) - CAI: 3-4.5 (this study)
NEQ-210c	5	3a	469.7	0.708767	27	13097	11	0.128	0.70878	0.708731	4.9e-05
NEQ-195c	20	3a	469.4	0.708715	7	9421	1	0.625	0.708728	0.708728	0
NEQ-75c	140	4b	463.575	0.708819	8	9649	8	0.184	0.708832	0.708653	0.000179
NEQ-60c	155	4b	462.35	0.708567	9	3252	10	0.161	0.70858	0.70858	0	0.00033
NEQ-45c	170	4c	461.708	0.708504	12	5979	10	0.083	0.708517	0.708517	0	0.000168
NEQ+16c	231	4c	458.419	0.708299	32	7266	9	0.327	0.708312	0.708312	0
NEQ+37c	252	5a	456.95	0.708228	14	9978	-	-	0.708241	0.708218	2.3e-05	3.3e-05
UF-1c	255.7	5a	456.689	0.708185	18	11494	7	0.394	0.708198	0.708198	0
UF-9c	287.3	5a	456.15	0.708192	12	8694	7	0.562	0.708205	0.708145	6e-05
UF-15c	309.8	5a	455.833	0.708162	16	14163	9	0.242	0.708175	0.708117	5.8e-05
UF-22Grc	351.1	5b	455.2	0.708053	28	8501	23	0.304	0.708066	0.708066	0
Shingle Pass - CAI: 3.5-4 (this study and Saltzman et al., 2014)
SP300c	91.4634	1c	480.22	0.709003	12	19891	7	0.541	0.709016	0.709016	9e-05	2.2e-05
SP573c	174.695	1c	480.112	0.709092	9	13967	12	0.526	0.709105	0.709013	0.000182	0.000246
SP991c	302.134	1d	479.941	0.709015	9	24696	9	0.263	0.709028	0.709013	0.000109	0.001461
SP1042c	317.683	1d	479.716	0.709015	10	23173	8	0.292	0.709028	0.709013	0.000116	0.00159
SP1200c	365.854	1d	479.018	0.708996	11	17531	20	0.368	0.709009	0.708993	0.000116	0.000634
SP1277c	389.329	1d	478.678	0.708963	11	17889	12	0.317	0.708976	0.708976	9.2e-05	0.000765
SP1402c	427.439	1d	478.126	0.708901	9	21173	33	0.472	0.708914	0.708914	4.2e-05	0.000473
SP1540c	469.512	2a	477.517	0.708928	9	19473	7	0.264	0.708941	0.708893	8.1e-05	0.000226
SP1760c	536.585	2b	475.012	0.708964	29	11276	30	0.168	0.708977	0.708863	0.00016	0.000169
SP1820c	554.878	2b	474.326	0.708851	13	9647	30	0.121	0.708864	0.708863	5.9e-05	0.000465
SP1980c	603.659	2b	473.118	0.708807	11	12222	14	0.274	0.70882	0.70882	3.3e-05	0.000527
SP2404c	732.927	2c	470.522	0.708815	7	12738	25	0.309	0.708828	0.708813	7.8e-05	0.000732
SP2653c	808.841	3a	468.903	0.7088	10	16621	19	0.37	0.708813	0.708813	9.2e-05	0.000208
SP2848c	868.293	3b	467.73	0.708842	12	11355	11	0.22	0.708855	0.708818	0.000136	0.000261
SP-93c	965	4a	466.787	0.708914	11	8169	11	0.629	0.708927	0.708813	0.000215
SP-165.5c	1037.5	4a	466.08	0.709251	26	4403	5	0.532	0.709264	0.708826	0.000558
SP-212c	1084	4a	465.626	0.708817	12	11635	7	0.25	0.70883	0.708798	0.00013
SP-237c	1109	4a	465.252	0.708767	12	17635	9	0.165	0.70878	0.70878	8.6e-05
SP-248.5c	1120.5	4a	465.079	0.708789	21	15918	11	0.485	0.708802	0.708768	0.00011
SP-290bc	1162	4b	464.457	0.708749	13	13119	14	0.36	0.708762	0.708762	8.2e-05
SP-366c	1238	4b	463.318	0.708716	8	13365	13	0.257	0.708729	0.708729	8.6e-05
Meiklejohn Peak - CAI: 4-5 (Saltzman et al., 2014)*
MP-18c	322	4b	464	0.708757	19	8542	13	0.35	0.70877	0.70877	0.000102
5-8-78-Oc	398.4	4b	463.77	0.708727	12	6370	9	0.171	0.70874	0.70874	7.9e-05
5-8-78-Ic	449.9	4b	463.1	0.708778	9	4476	11	0.232	0.708791	0.708743	0.000159
5-8-78-Hc	456	4b	463	0.708788	12	5895	8	0.108	0.708801	0.708743	0.000176
5-7-78-Qc	538.9	4b	462.35	0.708698	18	10033	10	0.068	0.708711	0.708711	0.000131
5-7-78-Mc	560.28	4c	461.23	0.708537	10	10186	10	0.254	0.70855	0.70855	8e-05
5-7-78-Lc	568.5	5a	456.26	0.708401	10	6882	8	0.102	0.708414	0.708414	0.000258
Interstate 81 - CAI: 4-5 (this study)
I-81 1c	-4	4c	460.54	0.708404	7	7971	11	0.405	0.708417	0.708405	3.1e-05	0.000734759
I-81 4c	-1	4c	460.24	0.708413	8	10172	12	0.517	0.708426	0.708405	4e-05	0.000416508
I-81 10c	1	4c	460.037	0.708386	9	10478	20	0.233	0.708399	0.708405	1.3e-05	0.000130329
I-81 13c	4	4c	459.74	0.708403	7	9808.59	11	0.256	0.708416	0.708405	3e-05	0.000219244
			Total:	137
* - meters in section cannot be directly tied into bulk carbonate meters in section because field studies were conducted at separate times and no painted section exists to directly
tie samples together
					Total D87Sr/86Sr:		<.000100	108
							<.000200	134
							<.000300	136
							<.000400	136
							<.000500	136

## Sheet: DR3-Brachiopods
Table DR3. 87Sr/86Sr values of brachiopod calcite (87Sr/86Srbrach), the Sr concentration (ppm), the corrected
87Sr/86Srbrach value, the estimated seawater 87Sr/86Sr value, and the Δ87Sr/86Sr.
Sample ID	Meters in section	Age (Ma)	87Sr/86Sr Brachiopod	Uncertainty (x 10-6)	ppm Sr	Corrected 87Sr/86Sr	Seawater 87Sr/86Sr	DSr (87Sr/86Srbrach-87Sr/86Srseawater)
Oklahoma
O-7038	-235	467.685	0.708695	8	744	0.708708	0.708723	-1.5e-05
O-7041	-230.5	467.583	0.708758	20	410	0.708771	0.708723	4.8e-05
O-7061	-200.5	466.904	0.708757	12	414	0.70877	0.708718	5.2e-05
B-27391	274	455.519	0.708191	90	16*	0.708204	0.708148	5.6e-05
Shingle Pass
S-7597	612	472.95	0.708939	13	440	0.708952	0.708819	0.000133
SP-165.52	1037.5	466.08	0.709388	54	383	0.709401	0.708826	0.000575
S-5096	1220	463.588	0.708605	28	455	0.708618	0.708728	-0.00011
* altered
1 = see Figure DR6
2 = see Figure DR5

## Sheet: DR4-Methods
Table DR4. Variation of bulk carbonate methods used to test which method
yielded the least radiogenic 87Sr/86Sr value.
Sample ID	87Sr/86Srtest	Uncertainty (x 10-6)	ppm Sr	Difference (87Sr/86Srtest-87Sr/86Srcontrol)
SP-300 = 0.709038 (control)
SP-300a	0.709019	10	145	-1.9e-05
SP-300b	0.709038	9	128	0
SP-300c	0.709055	11	66	1.7e-05
SP-300d	0.70908	13	143	4.2e-05
SP-300e	0.709032	8	205	-6e-06
SP-300f	0.70903	9	155	-8e-06
SP-991 = 0.710489 (control)
SP-991a	0.709983	8	170	-0.000506
SP-991b	0.709991	10	159	-0.000498
SP-991c	0.710102	12	72	-0.000387
SP-991d	0.709831	9	160	-0.000658
SP-991e	0.709919	8	235	-0.00057
SP-991f	0.709834	10	159	-0.000655
SP-2848 = 0.709116 (control)
SP-2848a	0.709221	9	232	0.000105
SP-2848b	0.709212	9	201	9.6e-05
SP-2848c	0.709334	11	55	0.000218
SP-2848d	0.709155	10	149	3.9e-05
SP-2848e	0.709156	8	307	4e-05
SP-2848f	0.709127	12	158	1.1e-05
a = No NH4 acetate rinse 4% acetic acid digestion
b = Only one 10 min NH4 acetate rinse 4% acetic acid digestion
c = 20/10/5 minute NH4 acetate rinses, 1% acetic acid leach
d = 4% acetic acid digestion of method c
e = 20/10/5 minute NH4 acetate rinses, 4% acetic acid leach
f = 8% acetic acid digestion of method b

## Sheet: DR5-Insolubles
Table DR5. 87Sr/86Sr of insoluble residues and their differences from seawater 87Sr/86Sr (see supplement for description of insoluble residues).
Sample ID	87Sr/86Srresidue	Uncertainty (x 10-6)	87Sr/86Srcarb	Residue difference (87Sr/86Srresidue-87Sr/86Srcarb)	Seawater 87Sr/86Sr	DSr (87Sr/86Srcarb-87Sr/86Srseawater)	D Residue (87Sr/86Srresidue-87Sr/86Srseawater)
Shingle Pass
SP300res	0.709325	12	0.709038	0.000287	0.709029	9e-06	0.000296
SP1042res	0.710437	13	0.710618	-0.000181	0.709026	0.001592	0.001411
SP1760res	0.709635	15	0.709146	0.000489	0.708876	0.00027	0.000759
SP2404res	0.719679	12	0.70956	0.010119	0.708826	0.000734	0.010853
SPK5088res	0.709274	9	0.708711	0.000563037	0.708754	-4.30366e-05	0.00052
SPK5101res	0.718454	27	0.708903	0.00955107	0.708734	0.000168931	0.00972
Antelope Range
402	0.737904	21	0.708266	0.029638	0.708176	9e-05	0.029728
379.5	0.720495	32	0.708425	0.01207	0.708311	0.000114	0.012184
Note: Residue samples were unspiked and measured in static multicollection mode for a total of 100 ratios

## Sheet: DR6-Leachate
Table DR6. 87Sr/86Sr of leachates from a selection of conodonts to test how much a pre-leaching step
can affect the conodont 87Sr/86Sr value (see supplement for description of leachate methods).
Sample ID	Meters in section	87Sr/86Srleachate	Uncertainty (x 10-6)	ppm Sr	87Sr/86Srconodont	Difference (87Sr/86Srleachate-87Sr/86Srconodont)
Oklahoma
83-JD-26L	26	0.708779	14	3872	0.708697	8.2e-05
83-JD-184L1	184	-	-	-	-	-
Antelope Range
8-8-75FL	414.39	0.708415	52	461	0.708229	0.000186
5-25-82-AIL	352.5	0.708521	15	1591	0.708447	7.4e-05
Clear Spring
I70-240L	240	0.708519	30	4416	0.708537	-1.8e-05
I70-300L	300	0.708377	15	1321	0.708429	-5.2e-05
1 = did not yield enough Sr to analyze

## Sheet: DR7-Time Bins
Table DR7. Mean, standard deviation (1s, uncertainty), and average D87Sr/86Sr of all 87Sr/86Sr measurements from each Ordovician Time Slice for brachiopods, conodonts, and bulk carbonate.
		Brachiopods				Conodonts				Bulk Carbonate (>300 ppm Sr)				Low CAI (1-2)				Intermediate (sections with CAI values
		(from Shields et al., 2003)																≤3 and [Sr] = 130-300 ppm)
Time Slice	Mid-age of Time Slice (Ma)	87Sr/86Sr mean	1s x 10-6	D87Sr/86Sr mean1 x 10-6	n	87Sr/86Sr mean	1s x 10-6	D87Sr/86Sr mean1 x 10-6	n	87Sr/86Sr mean	1s x 10-6	D87Sr/86Sr mean1 x 10-6	n	87Sr/86Sr mean	1s x 10-6	D87Sr/86Sr mean1 x 10-6	n	87Sr/86Sr mean	1s x 10-6	D87Sr/86Sr mean1 x 10-6	n
1a	484.63
1b	482.897					0.708985	11.3137	8	2
1c	480.973	0.709028	20	131	3	0.70899	72	54	5									0.710126*	1538	203	2
1d	478.855					0.708991	48	95	5									0.709711	554	827	5
2a	476.6	0.709048	100	239	4	0.708941		81	1									0.709146		329	1
2b	474.125	0.709048	80	274	4	0.708887	80.9877	84	3									0.709338	13	542	2
2c	471.375	0.708898	130	164	6	0.708798	42.4264	54	2									0.709141	441	396	3
3a	469.325	0.708908	260	181	13	0.708763	39	36	7									0.708975	168	251	3
3b	467.975	0.708768	40	54	5	0.708786	51.1949	67	4									0.709549		830	1
4a	466.113	0.708758	20	102	9	0.708782	70	80	10	0.708765*		60	1	0.708833		128	1	0.709312	331	606	6
4b	463.443	0.708768	70	367	5	0.708704	63	70	29	0.708749	61	147	14	0.708781	96	192	15	0.708808	128	191	32
4c	460.18	0.708638	30	414	2	0.708472	84	44	39	0.708585	55	135	2	0.708653	127	199	11	0.708519	174	120	42
5a	456.927					0.708317	97	80	16	0.708275	45	85	17	0.708233	57	20	7	0.708347	132	98	28
5b	454.227	0.708108	90	167	30	0.708067	75.3284	42	7	0.708149	40	93	9	0.708098	63	56	6	0.708116	97	78	4
			Avg.	Avg.	Total		Avg.	Avg.2	Total		Avg.	Avg.2	Total		Avg.	Avg.2	Total		Avg.	Avg.	Total
			84	209.3	81		61.1876	59.5	130		50.25	115	43		85.75	116.75	40		226.444	388	127
*- excludes outlier values
1 - Δ87Sr/86Sr means are calculated by taking the difference between the 87Sr/86Sr of each sample and its corresponding seawater 87Sr/86Sr value from the least radiogenic conodont values (Tables DR1-DR3).
2 - Averages do not include values from Time Slices with only one value.

## Sheet: DR8-TS averages
Table DR8. Averages of 1σ (uncertainty) and Δ87Sr/86Sr values from all Ordovician Time Slices (see Table DR7)
for conodont, brachiopod, and bulk carbonate compared to Neoproterozoic bulk carbonate samples
Material	Average of 1s (uncertainty) values for all age-binned samples (x 10-6)	D87Sr/86Sr mean1 (x 10-6)	n
Ordovician Conodonts	61.1876	59.5	130
Ordovician Brachiopods	84	209.3	81
Ordovician Bulk carbonate:
Sr ppm >300 ppm	50.25	104	43
Low CAI (1-2)	85.75	119	40
Intermediate (sections with CAI values ≤3 and [Sr] = 130-300 ppm)	226.444	388	127
Neoproterozoic Bulk carbonate	88*		68
*= samples that meet a lower Sr concentration threshold suggested by Halverson et al. (2007) and
averaged using 68 50-m thick intervals based on similar thickness of a Time Slice in this study.
1 - Δ87Sr/86Sr mean is calculated by taking the difference between the 87Sr/86Sr of each sample
(conodonts, carbonate, or brachiopod) and its corresponding seawater 87Sr/86Sr value (Table DR7).

## Sheet: DR9-Sr ppm calc
Table DR9: Calculations for the possible range of [Sr] in Ordovician Seas
	Low	High	Reference
[Ca] in oceans (mMol/kg)	30	40	Lowenstein et al. 2003
Sr in brachiopod calcite (ppm)	800	1500	Steuber and Veizer, 2002
DSr	0.13		Steuber and Veizer, 2002
			mol Sr in seawater with:
Brachiopod [Sr] (µg/g)	Mol Sr/Mol Ca of brachiopod	Mol Sr/Mol Ca of seawater	30 mMol [Ca]	40 mMol [Ca]	ppm Sr (if [Ca] = 30 mMol)	ppm Sr (if [Ca] = 40 mMol)
800	0.000913472	0.00702671	0.000210801	0.000281068	18.4704	24.6272
1500	0.00171276	0.0131751	0.000395252	0.000527003	34.632	46.176
